1 Estimation of introduction and transmission rates of SARS-CoV-2 in a  
2 prospective household study

3 Michiel van Boven<sup>a,b</sup>, Christiaan H. van Dorp<sup>c</sup>, Ilse Westerhof<sup>a</sup>, Vincent Jaddoe<sup>d</sup>, Valerie  
4 Heuvelman<sup>d</sup>, Liesbeth Duijts<sup>d</sup>, Elandri Fourie<sup>e</sup>, Judith Sluiter-Post<sup>e</sup>, Marlies A. van Houten<sup>e</sup>,  
5 Paul Badoux<sup>f</sup>, Sjoerd Euser<sup>f</sup>, Bjorn Herpers<sup>f</sup>, Dirk Eggink<sup>g</sup>, Marieke de Hoog<sup>a</sup>, Trisja Boom<sup>a</sup>,  
6 Joanne Wildenbeest<sup>h</sup>, Louis Bont<sup>h</sup>, Ganna Rozhnova<sup>a,b,i</sup>, Marc J. Bonten<sup>a</sup>,  
7 Mirjam E. Kretzschmar<sup>a,b</sup>, and Patricia Bruijning-Verhagen<sup>a</sup>

8 <sup>a</sup> *Julius Center for Health Sciences and Primary Care, University Medical Center Utrecht, Utrecht University, Utrecht, the*  
9 *Netherlands*

10 <sup>b</sup> *Center for Complex Systems Studies (CCSS), Utrecht University, Utrecht, The Netherlands*

11 <sup>c</sup> *Department of Pathology & Cell Biology, Columbia University Irving Medical Center, New York, United States*

12 <sup>d</sup> *Erasmus Medical Center, Rotterdam, the Netherlands*

13 <sup>e</sup> *Spaarne Gasthuis, Hoofddorp, the Netherlands*

14 <sup>f</sup> *Regional Public Health Laboratory Kennemerland, Haarlem, the Netherlands*

15 <sup>g</sup> *National Institute for Public Health and the Environment, Bilthoven, the Netherlands*

16 <sup>h</sup> *Department of Paediatric Infectious Diseases and Immunology, Wilhelmina Children's hospital, University Medical Center*  
17 *Utrecht, the Netherlands*

18 <sup>i</sup> *BioISI—Biosystems & Integrative Sciences Institute, Faculdade de Ciências, Universidade de Lisboa, Lisbon, Portugal*

19 June 2, 2023

## 20 Abstract

21 *Household studies provide an efficient means to study transmission of infectious diseases, enabling esti-*  
22 *mation of individual susceptibility and infectivity. A main inclusion criterion in such studies is often the*  
23 *presence of an infected person. This precludes estimation of the hazards of pathogen introduction into*  
24 *the household. Here we use data from a prospective household-based study to estimate SARS-CoV-2*  
25 *age- and time-dependent household introduction hazards together with within household transmission*  
26 *rates in the Netherlands from August 2020 to August 2021. Introduction hazards and within-household*  
27 *transmission rates are estimated with penalized splines and stochastic epidemic models, respectively. The*  
28 *estimated hazard of introduction of SARS-CoV-2 in the households was lower for children (0-12 years)*  
29 *than for adults (relative hazard: 0.62; 95%CrI: 0.34-1.0). Estimated introduction hazards peaked in mid*  
30 *October 2020, mid December 2020, and mid April 2021, preceding peaks in hospital admissions by 1-2*  
31 *weeks. The best fitting transmission models include increased infectivity of children relative to adults and*  
32 *adolescents, such that the estimated child-to-child transmission probability (0.62; 95%CrI: 0.40-0.81) was*  
33 *considerably higher than the adult-to-adult transmission probability (0.12; 95%CrI: 0.057-0.19). Scenario*  
34 *analyses show that vaccination of adults could have strongly reduced infection attack rates in households*  
35 *and that adding adolescent vaccination would have offered limited added benefit.*

## 36 Introduction

37 Transmission of SARS-CoV-2 occurs predominantly in indoor settings such as public transportation,  
38 workplaces, schools, and households [1–4]. Infection can cause the respiratory and systemic disease  
39 COVID-19, but in general severity and progression of the disease are mild [5, 6]. This has hampered,  
40 even despite huge research efforts, to accurately quantify variations in susceptibility and infectiousness,  
41 and how these depend on host characteristics such as age and sex, type of infecting strain, pre-existing  
42 immunity, and vaccination.

43 Household studies are considered the gold standard for the study of infectious disease transmission,  
44 as they provide a setting in which transmission events can be pinned down to one or a small number  
45 of potential infectors [7–18]. Classical analyses of household data use statistical regression techniques to  
46 estimate the fraction of persons that are infected over the course of a household outbreak (the secondary  
47 attack rate or SAR), stratified by person-type and household characteristics [19]. For SARS-CoV-2, a  
48 meta analysis of 54 studies has revealed that secondary attack rates are higher when the index case is

49 symptomatically infected, that transmission to adults occurs more often than to children, that trans-  
50 mission to spouses occurs more often than to other family contacts, but that there are no significant  
51 sex-differences in attack rates [4]. These studies, while providing valuable information, do not provide  
52 estimates of parameters that have a biological interpretation, and in particular do not provide insight in  
53 the rates of direct person-to-person transmission. As a consequence, they also do not lend themselves to  
54 extrapolation and scenario analyses. In addition, most studies use a reactive design in which households  
55 are included only after an infected person has been detected in the household (see [20] for an exception).  
56 This makes these studies vulnerable to bias, e.g., household-size biased inclusion and bias toward inclusion  
57 of households with more severely infected index cases. Also, as households are only included after the first  
58 infection these studies cannot estimate the rates at which infections are introduced into the household.

59 We propose the prospective household-based cohort study as an attractive crossover of the reactive  
60 household study and the prospective cohort study. While classical person-based prospective cohort studies  
61 in principle can provide high-quality information on risk factors and confounding variables, they are also  
62 inefficient if the outcome (infection) occurs infrequently [21]. This inefficiency is remedied by employing a  
63 household based inclusion, as it increases the number of events (i.e. infections). We illustrate this by using  
64 data from a prospective household study carried out in the Netherlands in the first year of the SARS-  
65 CoV-2 pandemic. The study contains a total of 1,209 persons distributed over 307 households, of which  
66 59 are infected during the study period. We analyze the data in a Bayesian framework using survival  
67 analysis for estimation of the hazards of introduction of SARS-CoV-2 into households, and stochastic  
68 SEIR epidemic models for estimation of within household transmission rates. As it is known that contacts  
69 between household members do not occur randomly [22], we stratify the analyses by person-type (child,  
70 adolescent, adult), and select the most likely contact structure based on statistical evaluation of competing  
71 models. We show that precise estimates of the type-specific introduction rates can be obtained together  
72 with the person-to-person transmission rates, and explore the impact of different vaccination strategies  
73 on reducing (1) the role of households as a multiplier of infection and (2) the probabilities of infection of  
74 specific persons (e.g., adults).

## 75 Results

### 76 Introduction of SARS-CoV-2 into households

77 Inclusion of households has been fairly uniform from September 2020 until January 2021, and decreasing  
78 from January 2021 onward (Fig. 1). Most households are included for the maximal follow-up period of  
79 161 days, and SARS-CoV-2 has been introduced and established in almost one out of five households (59  
80 of 307, 19%).

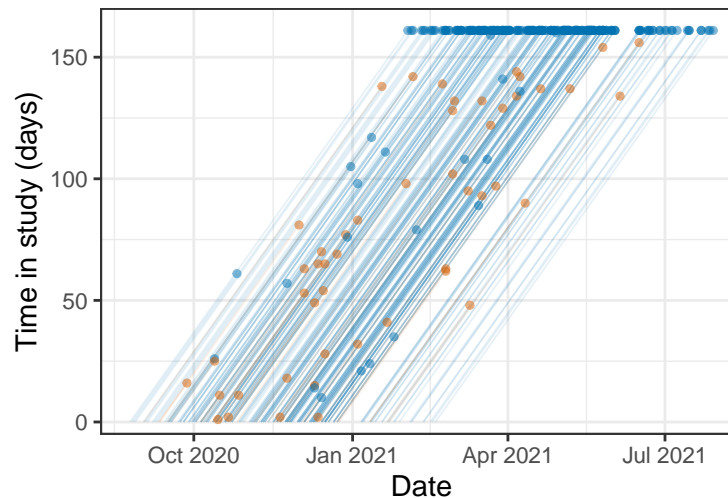

Figure 1: Lexis diagram of the study population. Lines show households from the date of inclusion in the study to infection of the first household member (brown dots), completion of the inclusion period without infection (blue dots at time in study of 161 days) or dropout (blue dots with time in study shorter than 161 days). Date of inclusion of the first household was 24 August 2020, and last date of the study was 29 July 2021.

81 Figure 2 shows the per-person hazard of introduction into the household for adults together with  
82 the 7-day smoothed hospital admissions in the Netherlands. It illustrates that per-person introduction  
83 hazards range from approximately 0.0002 per adult per day in February 2021 and July 2021 to almost  
84 0.001 per adult per day in December 2020. Specifically, there are three peaks in the introduction hazards,  
85 viz. 0.00080 (95%CrI: 0.00039–0.0015) per adult per day in mid-October 2020, 0.0010 (95%CrI: 0.00058–  
86 0.0017) in mid-December 2020, and 0.00074 (95%CrI: 0.00042 – 0.0014) in early April 2021. These peaks  
87 consistently precede peaks in the number of hospital admissions with SARS-CoV-2 by 1 to 2 weeks. The  
88 per-person hazards of introduction of SARS-CoV-2 for children and adolescents are estimated relative to  
89 adults, and indicate that children (relative hazard 0.62, 95%CrI: 0.34 – 1.0) have a lower introduction rate  
90 into the household than adults, while the introduction hazard of adolescents is similar to that of adults  
91 (relative hazard 0.97, 95%CrI: 0.52 – 1.7).

92 To explore whether the hazards of introduction can be explained by simpler parametric functions with  
93 small number of parameters we perform a number of sensitivity analyses. For instance, a scenario which  
94 assumes fixed person-specific introduction hazards yield estimates of the introduction hazards of 0.00030  
95 (0.00018 – 0.00047) per day for children, 0.00053 (0.00031 – 0.00086) per day for adolescents, and 0.00052  
96 (0.00039 – 0.00067) per day for adults. Hence, this model confirms that the introduction hazard is lower  
97 for children than for adolescents and adults. However, this fixed-hazard model has low statistical support  
98 compared to the spline model ( $\Delta\text{LOO\_IC} > 5$  and  $\Delta\text{WBIC} > 10$  in favor of the spline model). Similarly,  
99 low-order polynomial extensions of this model also have low statistical support (not shown).

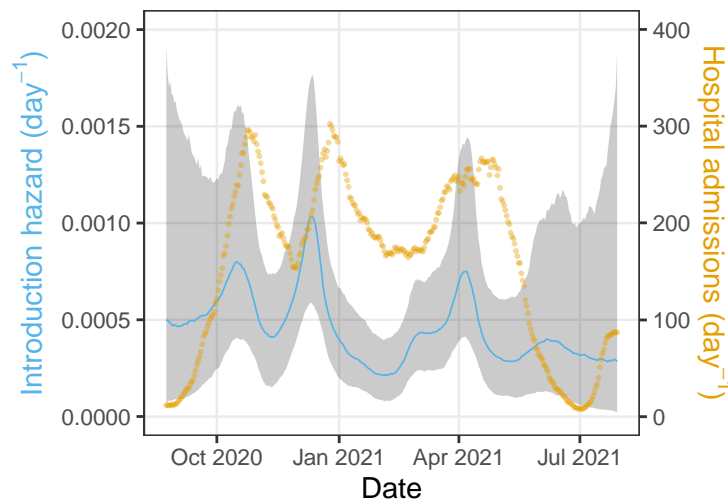

Figure 2: Estimates of the household introduction hazard for adults. Shown are the posterior median of the introduction hazard per person (blue line) with associated 95% credible envelope (gray area). Household introduction hazards of children and adolescents are obtained by multiplication of the hazard for adults with the relative introduction hazards for children and adolescents (Table 2). Also presented are the daily number of hospitalisations (yellow dots). To remove weekday effects the number of hospitalisations are represented by a 7-day moving average centered around the current day.

## 100 Within-household transmission of SARS-CoV-2

101 A total of 59 out of 307 households had a detected SARS-CoV-2 introduction over the course of the study,  
102 and in these 59 households 119 of 237 persons had documented SARS-CoV-2 infections. Of these 119  
103 infections, 77 are considered primary or co-primary cases that introduced the infection in the households.  
104 Total numbers of children, adolescents, and adults in these households are 89, 31, and 117, corresponding  
105 numbers of primary and co-primary cases are 21, 8, and 48, and corresponding numbers of household  
106 infections are 19, 3, and 20.

107 The household data are analyzed with a suite of transmission models that vary in their assumptions

| Model                                      | n | LOO_IC | WBIC  |
|--------------------------------------------|---|--------|-------|
| No stratification                          | 1 | 143.9  | 141.7 |
| Variable susceptibility                    | 3 | 145.4  | 140.1 |
| Variable infectivity                       | 3 | 138.1  | 133.8 |
| with child-to-child transmission           | 4 | 135.1  | 129.0 |
| with adolescent-to-adolescent transmission | 4 | 140.5  | 135.1 |
| with adult-to-adult transmission           | 4 | 139.4  | 133.7 |
| Proportionate mixing                       | 5 | 142.0  | 134.1 |
| Full model                                 | 9 | 142.6  | 130.9 |

Table 1: **Comparison of household models using information criteria.** Model selection is based on the information criteria LOO\_IC and WBIC. Shown are results for models that do not stratify the population by age (‘no stratification’), and that stratify the population into children (0-12 years), adolescents (12-18 years), and adults (over 18 years). Stratified transmission models are considered in which susceptibility of different age groups is estimated while infectivity is assumed to be identical for different age group (‘variable susceptibility’), in which infectivity is estimated while susceptibility is fixed (‘variable infectivity’), and in which both susceptibility and infectivity are estimated (‘proportionate mixing’). Within the ‘variable infectivity’ model we further consider sub-models with transmission rates for child-to-child, adolescent-to-adolescent, and adult-to-adult transmission. A saturated model with a separate parameter for each transmission rate is also considered (‘full model’). The number of within-household parameters is indicated by  $n$ . All models assume density-dependent transmission.

108 on the person-to-person transmission rates. An overview of the scenarios is given in Table 1. The  
109 analyses show that models that do not stratify the population by person-type (‘no stratification’), or  
110 models that assume a separate transmission parameter for each person-type combination (‘full model’)  
111 perform less well than models of intermediate complexity. In particular, the ‘variable infectivity’ model  
112 with an additional parameter for child-to-child transmission performs best both with regard to LOO\_IC  
113 and WBIC.

114 Parameter estimates of the preferred model indicate that children are more infectious overall than  
115 adults and adolescents (relative infectivity: 2.4, 95%CrI: 1.4 – 5.9), and that child-to-child transmission  
116 has the highest estimated transmission rate (0.97 per infectious period, 95%CrI: 0.51–1.7)(Table 2). Using  
117 the estimates of Table 2, Fig. 3 presents the estimated probabilities of person-to-person transmission. Here  
118 the highest estimated transmission probability is from child-to-child (0.62, 95%CrI: 0.40 – 0.81), followed  
119 by transmission from child-to-adult and child-to-adolescent (0.25, 95%CrI: 0.13 – 0.40), and from adult  
120 to all other person-types (0.12, 95%CrI: 0.057 – 0.19). All other transmission routes have lower estimated  
121 transmission probabilities ( $\leq 0.10$ ).

122 Sensitivity analyses are performed with respect to the distribution of the infectious period and as-  
123 sumptions on the primary case(s) in the household. As final size distributions are invariant with respect  
124 to the mean of the infectious period [23], we focus on how the results are affected by variation in the

| Parameter                                                              | Estimate | 95%CrI       |
|------------------------------------------------------------------------|----------|--------------|
| Transmission rate among adults<br>(per person per infectious period)   | 0.13     | (0.059-0.22) |
| Infectiousness of children relative to adults                          | 2.4      | (1.4-5.9)    |
| Infectiousness of adolescents relative to adults                       | 0.85     | (0.076-3.9)  |
| Transmission rate among children<br>(per person per infectious period) | 0.97     | (0.51-1.7)   |
| Relative introduction hazard for children                              | 0.62     | (0.34-1.0)   |
| Relative introduction hazard for adolescents                           | 0.97     | (0.52-1.7)   |

Table 2: **Estimates of within-household transmission parameters.** Parameter estimates are shown for the variable infectivity model with separate child-to-child transmission (cf. Table 1). Estimates are represented by posterior medians and 2.5% and 97.5% posterior quantiles, and are based on 1,000 samples from the posterior distribution. Notice that the introduction hazard parameters of children and adolescents are relative to the introduction hazard in adults (cf. Fig. 2).

125 infectious period distribution. We consider scenarios with an infectious period of fixed duration, and one  
126 with an infectious period with more variation than in the default scenario. The parameter estimates of  
127 the scenario with fixed infectious period are very close to those reported in Table 2 (not shown). The  
128 same is true if variation in the infectious period is increased such that the 95% coverage is 0.61 – 1.48  
129 (gamma shape and rate parameter both equal to 20) instead of 0.74 – 1.30 in the default scenario. Second,  
130 we consider a scenario in which we assume that all cases that had originally be designated as co-primary  
131 cases (i.e. infected from outside of the household) had actually been infected within the household [3].  
132 In this scenario, the precision with which introduction hazards can be estimated is decreased, while  
133 precision of within-household transmission parameter estimates is increased. Noteworthy, the overall  
134 within-household transmission rate between adults increases, while the three peaks of the introduction  
135 hazard are still noticeable but are decreased in size. Overall patterns of within-household transmission,  
136 including the high estimated child-to-child transmission rates, remain as in the main analyses.

### 137 **The impact of vaccination on household transmission**

138 The above preparations enable quantification of the role of households as a multiplier of infection. We focus  
139 on the secondary attack rate (SAR) and the probability that a focal adult in the household is infected.  
140 Table 3 shows the results for various household compositions and vaccination scenarios. Specifically, we  
141 consider two vaccination scenarios, one in which all adults in the household are vaccinated, and another  
142 one in which both adolescents and adults are vaccinated. In both cases we assume a leaky vaccine that  
143 is highly effective in preventing infection ( $VE_S = 0.9$ ) but does not reduce infectiousness ( $VE_I = 0$ ).  
144 Due to the high estimated infectiousness of children, estimated SARs are invariably higher if a child is

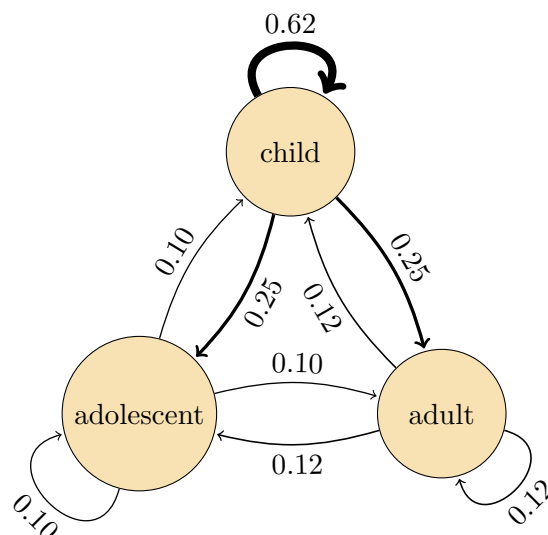

Figure 3: Estimated person-to-person transmission probabilities. Shown are posterior medians of the infectious contact probabilities, i.e. the probabilities that a transmission event would have occurred from an infected person over its infectious period if the contacted person had not already been infected by another person. Infectious contact probabilities are calculated from the person-to-person transmission rates per infectious period  $\beta_{ij}$  (Table 2) and the Laplace transform of the scaled infectious period distribution:  $\mathbb{P}(i \text{ infected by } j) = 1 - \left(1 + \frac{\beta_{ij}}{\alpha}\right)^\alpha$ , where  $\alpha = 50$  is the shape parameter of the infectious period probability distribution.

145 the primary case rather than an adolescent or adult. Differences in outbreak size can be substantial,  
 146 especially in larger households. For instance, in households of six persons the estimated SAR is 0.50 if  
 147 the child is the primary case, but less than 0.25 if it is the adolescent or adult. Noteworthy, estimates are  
 148 less precise in households with one or more adolescents due to the relatively small number of adolescents  
 149 in our study.

150 For the estimated parameters, vaccination with an effective but slightly leaky vaccine has the potential  
 151 to strongly reduce the size of the household outbreaks (Table 2). For instance, in households consisting  
 152 of a single child and a single adult, the SAR is 0.25 if the child is the primary case and no vaccination  
 153 is applied, but just 0.029 if the adult has been vaccinated. In larger households, sizeable reductions can  
 154 also be achieved, depending on the primary case. Focusing again on households of six persons, the SAR  
 155 is reduced from 0.50 to 0.31 if a child is the primary case, from 0.21 to 0.11 if the primary case is an  
 156 adolescent, and from 0.24 to 0.18 if the primary case is an adult. Adding vaccination of adolescents does  
 157 further decrease household outbreak size in households in which an adolescent is present. However, due  
 158 to the smaller rates of transmission to and from adolescents (Figure 3) the added benefit of adolescent  
 159 vaccination is smaller compared to adult vaccination.



| Household composition (numbers) |             |        | Primary case | Vaccination scenario |              |       |                        |       |                |
|---------------------------------|-------------|--------|--------------|----------------------|--------------|-------|------------------------|-------|----------------|
| children                        | adolescents | adults |              | No vaccination       | Adults       |       | Adults and adolescents |       |                |
| 1                               | 0           | 1      | child        | 0.25                 | (0.13-0.40)  | 0.029 | (0.014-0.050)          | 0.029 | (0.014-0.050)  |
| 1                               | 0           | 1      | adult        | 0.12                 | (0.057-0.19) | 0.12  | (0.057-0.19)           | NA    |                |
| 0                               | 1           | 1      | adolescent   | 0.10                 | (0.011-0.30) | 0.011 | (0.001-0.035)          | 0.011 | (0.001-0.035)  |
| 0                               | 1           | 1      | adult        | 0.12                 | (0.057-0.19) | 0.12  | (0.057-0.19)           | 0.12  | (0.057-0.19)   |
| 2                               | 0           | 2      | child        | 0.48                 | (0.33-0.62)  | 0.24  | (0.16-0.31)            | NA    |                |
| 2                               | 0           | 2      | adult        | 0.20                 | (0.097-0.31) | 0.13  | (0.065-0.21)           | NA    |                |
| 0                               | 2           | 2      | adolescent   | 0.13                 | (0.014-0.37) | 0.043 | (0.0048-0.13)          | 0.011 | (0.0012-0.036) |
| 0                               | 2           | 2      | adult        | 0.14                 | (0.068-0.24) | 0.093 | (0.045-0.15)           | 0.013 | (0.0060-0.022) |
| 2                               | 2           | 2      | child        | 0.50                 | (0.32-0.67)  | 0.31  | (0.21-0.42)            | 0.16  | (0.11-0.21)    |
| 2                               | 2           | 2      | adolescent   | 0.21                 | (0.024-0.54) | 0.11  | (0.012-0.31)           | 0.078 | (0.0086-0.20)  |
| 2                               | 2           | 2      | adult        | 0.24                 | (0.12-0.38)  | 0.18  | (0.092-0.28)           | 0.089 | (0.045-0.14)   |

Table 3: **Estimated secondary attack rates without and with vaccination.** Shown are inferred secondary attack rates (SARs) for various household compositions. Estimates are represented by posterior medians and 2.5% and 97.5% posterior quantiles. Households consist of either a child and an adult (rows 1-2), an adolescent and an adult (rows 3-4), two children and two adults (rows 5-6), two adolescents and two adults (rows 7-8), or two children, two adolescents, and two adults (rows 9-11), thus including the most common household compositions in the Netherlands (rows 1-8). For each household composition, SARs are calculated for all possible primary cases. Vaccination scenarios are considered in which adults are vaccinated, or in which both adults and adolescents are vaccinated. The vaccine is assumed to be 90% effective ( $VE_S = 0.9$ ) in preventing infection. NA: households do not contain an adolescent. Estimates are based on 1,000 samples from the posterior distribution.

160 Second, we explore how adding adolescent vaccination might further reduce the probability of infection  
161 of a specific adult. This is especially relevant as adults have an intrinsically higher risk of severe disease,  
162 especially if the adult is immunocompromised or immunosuppressed [24, 25]. We focus on a number of  
163 illustrative scenarios for various household compositions and vaccination scenarios. The analyses show  
164 that the estimated probability of infection of the adult is high in the absence of vaccination, especially if  
165 a child is the primary infection in the household (Figure 4A), but can be strongly reduced by adult vac-  
166 cination (Figure 4B). However, adding adolescent vaccination does not noticeably reduce the probability  
167 of adult infection further, as transmission is already strongly reduced and adults are already protected  
168 directly by vaccination (Figure 4C).

## 169 Discussion

170 We have shown that precise estimates of SARS-CoV-2 household introduction hazards as well as within-  
171 household transmission rates can be obtained in a modestly sized study. This has been possible by virtue  
172 of the prospective set-up in which households are included before the first infection in the household has  
173 been observed. The prospective design has the added benefit compared to reactive household studies that  
174 there is lower risk of bias, in particular bias caused by preferential inclusion of larger households (as it

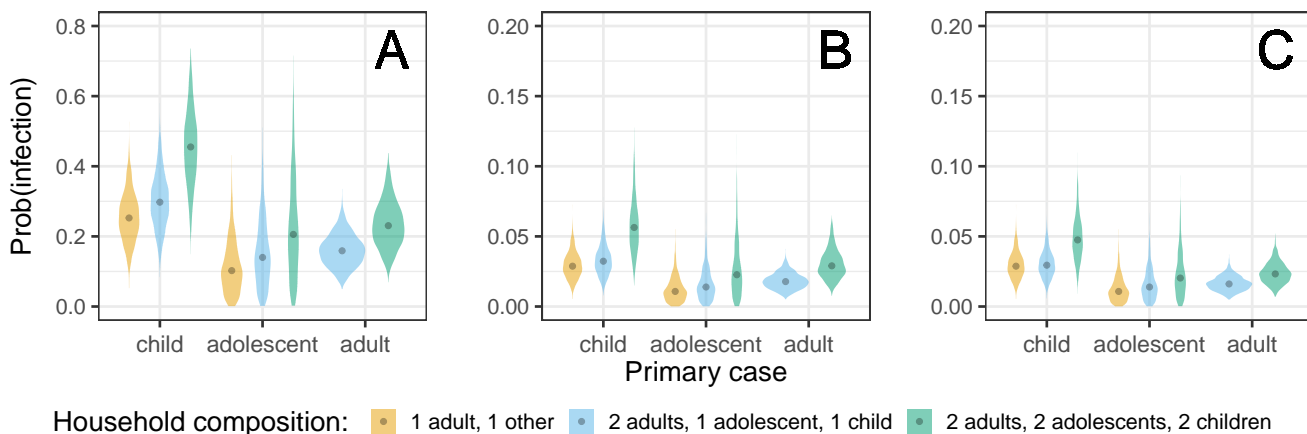

Figure 4: Estimates of the probability of infection of an adult for different household compositions, primary infection (child, adolescent, adult), and vaccination strategies. (A) no vaccination, (B) vaccination of adults, and (c) vaccination of adults and adolescents (C). Plots represent the posterior distribution (1,000 samples), and black dots indicate posterior medians. Vaccine efficacy for susceptibility is  $VE_S = 0.9$ . Notice the difference in scale on the y-axis between (A) and (B)-(C).

175 is more likely that an infection is introduced in a larger than in a smaller household) and by preferential  
 176 inclusion of households with severe infections (as these are more likely noticed) [4,26]. To make this design  
 177 work logistically, we have employed a so-called passive-active follow-up strategy in which household are  
 178 semi-passively followed during the at-risk period with an app, and in which more intensive follow-up is  
 179 performed upon notification of an acute respiratory symptoms in the household [3].

180 With regard to the introduction hazards we have taken an agnostic approach in which hazards are  
 181 optimally informed by the data, i.e. without assuming a specific underlying population-level transmission  
 182 model. This was done on purpose, as the early SARS-CoV-2 pandemic has been strongly affected by lock-  
 183 downs and behavioral responses, and is not easily described by simple transmission models [27–29]. With  
 184 regard to within-household transmission, however, we fit a stochastic transmission model to the data.  
 185 The within-household analyses provide estimates of age-stratified transmission rates, and in particular  
 186 yield estimates of intrinsic transmissibility between children, adolescents, and adults in a population with  
 187 low vaccination coverage and low pre-existing cumulative infection attack rates ( $\approx 10 - 20\%$ , [30]). Our  
 188 analyses have revealed that, compared with adolescents and adults, children were not the main source  
 189 of introduction of SARS-CoV-2 into households, that adolescents played a minor role propagating the  
 190 infection in the household, that children were the dominant transmission source in the household (see  
 191 also [2, 18, 26]), and in general that quantitative estimates of introduction hazards can be obtained. In  
 192 fact, we are not aware of other studies providing such estimates that are optimally informed by the data.  
 193 In our analyses, the estimated introduction hazards range from  $\approx 0.0001$  per child per day in epidemic

194 troughs to  $\approx 0.001$  per adolescent/adult per day in epidemic upswings. Timing of the peaks and troughs  
195 relative to hospital admissions in the Netherlands (Figure 2) suggest that this approach has produced  
196 reliable results.

197 While we are convinced that within the confines of our data we have selected a transmission model  
198 that is in a statistical sense optimal, we also acknowledge a number of weaknesses and alternatives. First,  
199 throughout we have assumed a so-called density-dependent transmission model in which each individual in  
200 the household makes a fixed number of contacts with each of the other household members per unit of time.  
201 This was done for convenience, as it enables direct translation of the estimated transmission parameters  
202 to conditional infection probabilities irrespective of household size, but also because this model provides a  
203 slightly better fit to the data than a frequency-dependent transmission model. However, our data contains  
204 just 59 infected households, and has limited variation in the size of infected households (3-6 persons).  
205 Therefore, alternative contact scenarios cannot yet be discarded (see also [22]). Reassuringly, estimates  
206 of person-to-person transmission probabilities are very close under the density- and frequency-dependent  
207 contact models for the most common household composition of four persons.

208 Second, we have assumed that if initial cases in the household are found at the same day, that these  
209 cases represent co-primary cases. If one or more of these co-primary cases would actually have been  
210 infected in the household, then including this information in the analyses increases within-household  
211 transmission rates while decreasing introduction hazards (see Results). In general, it will be very difficult  
212 to determine which person or persons have been the primary case or primary cases if onsets of symptoms  
213 are on the same day or only a few days apart. This inability to pinpoint the primary case is common to all  
214 household-based studies, and is a weakness that is not easily remedied. Fortunately, in sensitivity analyses  
215 our results appeared qualitatively robust to such trade-offs between introduction and transmission rates  
216 when more or fewer infections are assumed to represent primary case(s).

217 A third point of concern is that temporal information is used to estimate the introduction hazard  
218 but that only limited temporal information is used in the within-household analyses. In fact, temporal  
219 information only affects the probability that an additional infection will be introduced from outside the  
220 household. We have assumed that household outbreaks have a duration that is equal to the outbreak  
221 durations as defined earlier [3]. In these analyses most household outbreaks had a duration of 2 to 5  
222 weeks (median: 26 days, range 13-126 days). Fortunately, the parameters seemed to be hardly affected  
223 by assumptions on the duration of the household outbreaks, as the estimated introduction hazard is  
224 very small compared to the within-household transmission rates ( $\approx 2$  orders difference). For instance,

225 setting the outbreak duration to either 14 or 28 days for all households hardly affected the results.  
226 More problematic, though, might be the implicit assumption that the introduction hazard may vary over  
227 time and by person-type, but does not depend on whether other household members have recently been  
228 infected outside the household. This can be unrealistic if household members share contacts outside of  
229 the household. Incorporation of such correlations in the introduction hazard is a major direction of future  
230 model development and applications.

231 Our findings demonstrate that prospective household-based studies hold considerable promise to study  
232 the interplay between vaccination- and infection-induced immunity on the household introduction haz-  
233 ard, the susceptibility to (re-)infection, and the infectiousness once infected in terms of biologically inter-  
234 pretable parameters. In addition, analysing such data using transmission models has the added advantage  
235 over traditional statistical analyses [2,26,31] that transmission model-based estimates can feed into impact  
236 analyses of interventions.

## 237 **Methods**

### 238 **Study design and data collection**

239 The Cokids household-based study into the causes of acute respiratory infections (ARIs) in households  
240 with underage children had been conducted between August 2020 to August 2021. Enrollment was focused  
241 on the period between August 2020 and February 2021. Eligible households had been selected from three  
242 existing Dutch birth cohort studies, and all had at least one child aged 0-17 years. Details of the study  
243 design are presented elsewhere [3]. Here we briefly mention the salient aspects of the study relevant to  
244 our analyses. First, the study contained a core study with follow-up of a maximum of 161 days, and an  
245 extended study with follow-up period until July 2021. Since follow-up criteria are different between the  
246 core and extended follow-up, and could potentially lead to bias, we here only include the basic follow-up  
247 period for estimation of the introduction hazards. We did, however, include 4 households in the extended  
248 follow-up in the analyses of within-household transmission. Additionally, there were 4 households of size  
249 2 in the core study that provided information on the introduction of SARS-CoV-2 into the household but  
250 not on within-household transmission as both persons were labelled as primary cases. There was only 1  
251 vaccinated person in the data used for our analyses.

252 All participants were checked daily, using an app developed specifically for the study, for the occurrence  
253 of respiratory symptoms and fever. In addition, all participants were screened for a panel of respiratory

254 viruses at a 4 to 6 weeks time interval, irrespective of symptoms. An outbreak study with intensified  
255 follow-up of the household was initiated when (1) a household member developed new-onset respiratory  
256 symptoms or fever, or (2) a SARS-CoV-2 positive result was received on a screening test, or (3) a positive  
257 test result was received from an external testing site. Details of the follow-up procedures are given  
258 elsewhere [3].

259 Hospital admission data have been retrieved from the National Institute for Public Health and the  
260 Environment's open data (<https://data.rivm.nl/covid-19>). To remove weekday effects we present  
261 these data as a centered 7-day moving average.

## 262 **Transmission model**

263 Our analyses are based on a multi-type susceptible-exposed-infectious-recovered (SEIR) transmission  
264 model. In this model individuals are classified as susceptible to infection (S), infected but not yet infectious  
265 (E), infected and infectious (I), or recovered and immune (R). Throughout we stratify the population by  
266 age as follows: children (under 12 years), adolescent (12-18 years), and adults (18 years and older). This  
267 stratification corresponds well with age at which children transition from primary to secondary school,  
268 and from secondary school to subsequent education in the Netherlands [2,3].

269 The within-household analyses use the number of infections that have occurred at the end of the  
270 household outbreaks [8,11,23,32]. Statistical methodology based on such final size data is well-developed,  
271 and these methods have advantages over analyses that use all temporal information. First, the number of  
272 infections in the household can usually be determined with high certainty, while the timing of transitions  
273 between classes is often uncertain. Second, final size analyses are invariant with respect to the latent  
274 period, i.e. the time that individual spend in the exposed (E) class [32]. Hence we may, without loss of  
275 generality, focus on a simplified SIR type model with no latent period. Third, final size data do not allow  
276 estimation of parameters with respect to calendar time, but only relative to other model parameters. This  
277 enables simplification of the model by reducing the number of parameters. Specifically, we can assume,  
278 again without loss of generality, that the mean of the infectious period is fixed at length 1 time unit,  
279 and set the basic reproduction number equal to the contact rate parameter in a reference class. Here, we  
280 assume that adults are the reference class. Variation in the infectious periods can affect the outcomes,  
281 however, and we assume that the infectious period is gamma distributed such that 95% equal-tailed  
282 coverage of the infectious period ranges from 0.74 to 1.30, i.e. approximately 6-10 days when the mean  
283 infectious period is 8 days [33]. We supplement the default analyses with a scenario in which the infectious

284 period is fixed at 1 time unit (i.e. delta-distributed), and with a scenario with increased variation in the  
285 infectious period such that the 95% coverage of the infectious period distribution ranges from 0.61 to 1.48  
286 of the mean.

287 Further, with respect to the number of contacts in households of different sizes we focus on two  
288 extremes, viz a density-dependent contact model in our default scenario, and a frequency-dependent  
289 contact model as alternative [34]. In the density-dependent model each household member makes an  
290 identical expected number of contacts *with each of the other household members* per unit of time, while  
291 in the frequency-dependent transmission model each household member makes an identical number of  
292 contacts per unit of time. Hence, in the frequency-dependent model fewer contact are made with each of  
293 the household members in a larger than in a smaller household.

## 294 The final size distribution

295 The statistical methods rely on the fact that we can compute the probability distribution of the final  
296 outbreak size of a given household. Let  $a$ ,  $n$  and  $j \in \mathbb{Z}_{\geq 0}^d$  represent the number of primary household  
297 cases, initially uninfected members and the number of secondary infections, respectively. Here  $d$  is the  
298 number of types (in our analysis  $d = 3$  age classes). Given fixed  $a$  and  $n$ , we want to calculate the  
299 probabilities  $Q_j$  of the final size  $0 \leq j \leq n$ . The probabilities  $Q_j$  depend on a number of parameters.  
300 First, we require the transmission rate matrix  $\beta \in \mathbb{R}_{\geq 0}^{d \times d}$ , in which the element  $\beta_{\mu\nu}$  denotes the transmission  
301 rate from an individual of type  $\nu$  to type  $\mu$ . Next, let  $b$  denote the vector of probabilities of escape from  
302 external infection, i.e.,  $1 - b_\mu$  is the probability that an individual of type  $\mu$  gets infected during the  
303 household outbreak by someone from outside the household. Finally, the duration of each infection is  
304 an i.i.d. random variable  $T_i$ . The probabilities  $Q_j$  are expressed in terms of the Laplace transform of  
305  $T_i$ , given by  $\phi(x) = \mathbb{E}[e^{-xT_i}]$ . In our analysis  $T_i \sim \text{Gamma}(\alpha, \alpha^{-1})$ , such that  $\mathbb{E}[T_i] = 1$  time unit, and  
306  $\phi(x) = (1 - x/\alpha)^{-\alpha}$ . For integer vectors  $m$  and  $\ell$  and a real vector  $x$ , we write  $x^m = \prod_{i=1}^d x_i^{m_i}$  and  
307  $\binom{m}{\ell} = \prod_{i=1}^d \binom{m_i}{\ell_i}$ . For the scalar function  $\phi$ , we write  $\phi(x)$  to denote the vector  $(\phi(x_1), \dots, \phi(x_d))'$ . With  
308 these definitions and notation in place, the final size probability  $Q_j$  is given by  $Q_j = P_j \binom{n}{j}$  where  $P_j$   
309 satisfies the recursive equation

$$\sum_{0 \leq k \leq j} \frac{P_k \binom{j}{k}}{\phi(\beta'(n-j))^{a+k} b^{n-j}} = 1. \quad (1)$$

310 Although formal derivations of Eq (1) can be found elsewhere [23,32], here we give an intuitive derivation  
311 using elementary methods. In particular, our analyses do not make use of a Wald identity. We present

312 the method for  $d = 1$  (i.e. no age stratification), but the arguments easily generalize to  $d > 1$ .

313 We write  $m : \ell$  to denote the set of indices  $m, m + 1, \dots, \ell$ , which is empty when  $m > \ell$ . First, we  
 314 enumerate the non-primary members of the household as  $1 : n$ , and we split them into two groups:  $1 : j$   
 315 and  $j + 1 : n$ . If we condition on how many members in the first group get infected, then we can easily  
 316 calculate the probability that none of the second group get infected. Suppose that  $k$  individuals of  $1 : j$   
 317 get infected, then this conditional probability equals

$$C_{k,j} = \mathbb{E}[e^{-\beta(n-j)(T_1 + \dots + T_{a+k})} b^{n-j}], \quad (2)$$

318 where  $T_1, \dots, T_{a+k}$  are the gamma-distributed lengths of the infectious periods of the  $a$  primary cases  
 319 and  $k$  infected members in group  $1 : j$ . The infectious periods of infected members can overlap, in which  
 320 case we assume the transmission hazard is additive. With probability  $b^{n-j}$ , no one in group  $j + 1 : n$  gets  
 321 infected due to external contacts. The lengths  $T_i$  are unknown, and therefore we take the expectation  
 322 to integrate them out. As the  $T_i$  are i.i.d., we get  $C_{k,j} = \phi(\beta(n-j))^{a+k} b^{n-j}$ . Next, let  $P_k$  denote the  
 323 probability that exactly individuals  $1 : k$  are infected. If  $k \leq j$ , then we can interpret  $P_k$  as the probability  
 324 that  $1 : k$  of the first group  $1 : j$  are infected, and none of  $j + 1 : n$  are infected. Moreover, the product  
 325  $J_{k,j} = P_k \cdot \binom{j}{k}$  is equal to the joint probability that  $k$  arbitrary members of group  $1 : j$  are infected (as  
 326 opposed to exactly members in  $1 : k$ ), and none of  $j + 1 : n$ . Finally, let  $U_{k,j}$  denote the unconditional  
 327 probability that  $k$  members of  $1 : j$  are infected (regardless of what happens to  $j + 1 : n$ ), then we find  
 328 using the definition of conditional probability that  $P_k$ , and  $U_{k,j}$  are related by

$$U_{k,j} = \frac{J_{k,j}}{C_{k,j}} = \frac{P_k \binom{j}{k}}{\phi(\beta(n-j))^{a+k} b^{n-j}}. \quad (3)$$

329 Using the law of total probability, we find that  $\sum_{k=0}^j U_{k,j} = 1$ , and hence we find the recursive Eq (1)  
 330 for  $P_k$ , which includes the edge case  $P_0 = \phi(\beta n)^a b^n$ , and therefore allows us to compute  $P_j$ . Since the  
 331 household division  $1:j$  and  $j+1:n$  was arbitrary, we can now compute the final size probability  $Q_j = P_j \binom{n}{j}$ .

### 332 Hazard of external infection

333 To estimate the hazard of external infection we use semi-parametric penalized splines [35]. A related but  
 334 simpler approach in which a fixed introduction probabilities are estimated for predefined periods is given  
 335 in House *et al* [20].

336 In our framework, the spline  $p(t)$  is defined as a linear combination of cubic basis splines  $p(t) =$

337  $\sum_{k=0}^K w_k B_k(t)$ , with 50 equidistant knots such that  $K = 52$ . To penalize large deviations of  $p(t)$ , the  
338 weights  $w$  are equipped with a random-walk prior as follows. We choose  $w_0 \sim \mathcal{N}(-7.5, 2.5)$  and define the  
339 other weights cumulatively as  $w_k = w_0 + \sigma \sum_{\ell=1}^k z_\ell$ , where  $z_\ell \sim \mathcal{N}(0, 10)$ . The diffusion parameter  $\sigma$  de-  
340 termines the smoothness of the spline and is given a weakly-informative prior  $\sigma^2 \sim \text{InvGamma}(1, 0.0005)$ .  
341 For the adult age class, we then define the hazard of infection  $h_3(t) = \exp(p(t))$ . The hazards for the  
342 other age classes are proportional to the adult hazard, i.e.  $h_1(t) = r_1 h_3(t)$  for children and  $h_2(t) = r_2 h_3(t)$   
343 for adolescents, where  $r_1, r_2 > 0$  are the relative hazards (Table 2).

## 344 Likelihood function

345 With the ingredients specified above, we can formulate the likelihood  $L(t, a, n, j)$  of observing a household  
346 infected at time  $t$  with  $a$  primary infected persons,  $n$  non-primary persons, and  $j$  persons infected over  
347 the course of the household outbreak:

$$L(t, a, n, j) = h(t)' a \exp\left(-\int_0^t h(s)'(a+n)ds\right) Q_j, \quad (4)$$

348 which is the product of the likelihood that the index cases are infected at time  $t$ , and the probability of  
349 final size  $j$ . This probability  $Q_j$  depends on  $n$  and  $a$ , but also on  $t$ , because the probability of escape  $b$   
350 depends on the external infection hazard  $h$  as follows:  $b = \exp\left(-\int_t^{t+\Delta t} h(s)ds\right)$ , where  $\Delta t$  is either set  
351 at 14 or 28 (days), or is defined as the household-specific period that an infected household is monitored.  
352 For households that were not infected during the study period, the final size is unobserved and the  
353 introduction time is right-censored. Therefore, the likelihood is given by

$$L(t, n) = \exp\left(-\int_0^t h(s)'n ds\right), \quad (5)$$

354 where  $t$  is time that the household dropped out of the study and  $n$  is the household composition. In our  
355 inferential analyses, we approximate the cumulative hazards with sums  $\int_{t_1}^{t_2} h(s)ds \approx \sum_{s=t_1}^{t_2-1} h(s)ds$ .

## 356 Inference and model selection

357 We estimate the parameters in a Bayesian framework using Hamiltonian Monte Carlo. Except for the  
358 weakly-informative weights of the penalized spline (see above), none of the other parameters are given  
359 explicit prior distributions. Hence, these parameters have (improper) uniform prior distributions on their  
360 domains, making each possible parameter value equally likely a priori. To reduce correlations between



parameters and facilitate mixing, we parameterize the proportionate mixing model and simplifications thereof in terms of absolute infectivities  $f_i$  and absolute susceptibilities  $g_i$  ( $i = 1, 2, 3$ ), such that the transmission rates are given by  $\beta_{i,j} = g_i f_j$ , and in particular the transmission rate in the reference class ( $i = 3$ , adults) is given by  $\beta \equiv \beta_{3,3} = g_3 f_3$ . Using this formulation the relative infectivities and susceptibilities of the other person-types (Table 2) are given by  $\frac{f_i}{f_3}$  and  $\frac{g_i}{g_3}$  ( $i = 1, 2$ ). Since one parameter is redundant, we have further taken  $g_3 \equiv 1$  without loss of generality.

All analyses are performed using Stan (version 2.29.0) and R (version 4.2.2) using the CmdStanR package (version 0.4.0) as interface between R and Stan [36]. We run 10 MCMC chains in parallel and base the analyses on 1,000 samples from 10 chains, where we have applied 1/10 thinning. In all model runs effective number of samples generally ranges from 900-1,100, while the convergence criterion  $\hat{R}$  ranges from 0.99-1.01. Data, scripts, and figures are available in the online repository at <https://github.com/mvboven/sars2-households>.

Model selection is based on information criteria for singular statistical models [37, 38]. Specifically, we use LOO\_IC from the loo package (version 2.4.1) to gauge relative predictive performance, and calculate WBIC using a run of the model at the appropriate sampling temperature to select the most likely data generating process. As estimation of the introduction hazards is already optimized for predictive performance, we have used LOOIC and WBIC only for the within-household analyses in model runs that exclude external infection during the household outbreaks.

## Acknowledgments and funding

We gratefully acknowledge all participants of the study. This study was funded by the Netherlands Organization for Health Research and Development (ZonMw) (grant 10150062010006) and the National Institutes of Health (NIH) (grants P01-AI131365 and R01-OD011095).

## References

- [1] Whaley CM, Cantor J, Pera M, Jena AB. Assessing the Association Between Social Gatherings and COVID-19 Risk Using Birthdays. *JAMA Intern Med.* 2021 Aug;181(8):1090–1099.
- [2] Reukers DFM, van Boven M, Meijer A, Rots N, Reusken C, Roof I, et al. High Infection Secondary Attack Rates of Severe Acute Respiratory Syndrome Coronavirus 2 in Dutch Households Revealed by Dense Sampling. *Clin Infect Dis.* 2022 Jan;74(1):52–58.

- 389 [3] de Hoog MLA, Sluiter-Post JGC, Westerhof I, Fourie E, Heuvelman VD, Boom TT, et al. Longi-  
390 tudinal Household Assessment of Respiratory Illness in Children and Parents During the COVID-19  
391 Pandemic. *JAMA Netw Open*. 2022 Oct;5(10):e2237522.
- 392 [4] Madewell ZJ, Yang Y, Longini J Ira M, Halloran ME, Dean NE. Factors Associated With House-  
393 hold Transmission of SARS-CoV-2: An Updated Systematic Review and Meta-analysis. *JAMA*  
394 *Network Open*. 2021 08;4(8):e2122240–e2122240. Available from: [https://doi.org/10.1001/](https://doi.org/10.1001/jamanetworkopen.2021.22240)  
395 [jamanetworkopen.2021.22240](https://doi.org/10.1001/jamanetworkopen.2021.22240).
- 396 [5] Guan WJ, Ni ZY, Hu Y, Liang WH, Ou CQ, He JX, et al. Clinical Characteristics of Coronavirus  
397 Disease 2019 in China. *N Engl J Med*. 2020 Apr;382(18):1708–1720.
- 398 [6] Martin B, DeWitt PE, Russell S, Anand A, Bradwell KR, Bremer C, et al. Characteristics, Out-  
399 comes, and Severity Risk Factors Associated With SARS-CoV-2 Infection Among Children in the  
400 US National COVID Cohort Collaborative. *JAMA Netw Open*. 2022 Feb;5(2):e2143151.
- 401 [7] Longini J I M, Koopman JS, Monto AS, Fox JP. Estimating household and community trans-  
402 mission parameters for influenza [Journal Article]. *Am J Epidemiol*. 1982;115(5):736–51. Longini,  
403 I M Jr Koopman, J S Monto, A S Fox, J P AI-6103-01/AI/NIAID NIH HHS/United States  
404 AI-62514/AI/NIAID NIH HHS/United States Comparative Study Journal Article Research Sup-  
405 port, U.S. Gov’t, P.H.S. United States 1982/05/01 *Am J Epidemiol*. 1982 May;115(5):736-51. doi:  
406 [10.1093/oxfordjournals.aje.a113356](https://doi.org/10.1093/oxfordjournals.aje.a113356).
- 407 [8] Addy CL, Longini IM, Haber M. A generalized stochastic model for the analysis of infectious disease  
408 final size data. *Biometrics*. 1991 Sep;47(3):961–974.
- 409 [9] Fraser C, Cummings DA, Klinkenberg D, Burke DS, Ferguson NM. Influenza transmission in house-  
410 holds during the 1918 pandemic. *Am J Epidemiol*. 2011 Sep;174(5):505–514.
- 411 [10] Tsang TK, Lau LLH, Cauchemez S, Cowling BJ. Household Transmission of Influenza Virus. *Trends*  
412 *Microbiol*. 2016 Feb;24(2):123–133.
- 413 [11] van Boven M, Koopmans M, Du Ry van Beest Holle M, Meijer A, Klinkenberg D, Donnelly CA,  
414 et al. Detecting emerging transmissibility of avian influenza virus in human households. *PLoS*  
415 *Comput Biol*. 2007 Jul;3(7):e145.

- 416 [12] Pitzer VE, Cohen T. Household studies provide key insights on the transmission of, and susceptibility  
417 to, SARS-CoV-2. *Lancet Infect Dis.* 2020 Oct;20(10):1103–1104.
- 418 [13] Pouwels KB, Pritchard E, Matthews PC, Stoesser N, Eyre DW, Vihta KD, et al. Effect of Delta  
419 variant on viral burden and vaccine effectiveness against new SARS-CoV-2 infections in the UK. *Nat*  
420 *Med.* 2021 Dec;27(12):2127–2135.
- 421 [14] Pritchard E, Matthews PC, Stoesser N, Eyre DW, Gethings O, Vihta KD, et al. Impact of vaccination  
422 on new SARS-CoV-2 infections in the United Kingdom. *Nat Med.* 2021 Aug;27(8):1370–1378.
- 423 [15] Li F, Li YY, Liu MJ, Fang LQ, Dean NE, Wong GWK, et al. Household transmission of SARS-CoV-  
424 2 and risk factors for susceptibility and infectivity in Wuhan: a retrospective observational study.  
425 *Lancet Infect Dis.* 2021 May;21(5):617–628.
- 426 [16] Hilton J, Riley H, Pellis L, Aziza R, Brand SPC, K Kombe I, et al. A computational framework for  
427 modelling infectious disease policy based on age and household structure with applications to the  
428 COVID-19 pandemic. *PLoS Comput Biol.* 2022 Sep;18(9):e1010390.
- 429 [17] Prunas O, Warren JL, Crawford FW, Gazit S, Patalon T, Weinberger DM, et al. Vaccination  
430 with BNT162b2 reduces transmission of SARS-CoV-2 to household contacts in Israel. *Science.* 2022  
431 Mar;375(6585):1151–1154.
- 432 [18] Tsang TK, Huang X, Wang C, Chen S, Yang B, Cauchemez S, et al. The effect of variation of  
433 individual infectiousness on SARS-CoV-2 transmission in households. *eLife.* 2023 mar;12:e82611.  
434 Available from: <https://doi.org/10.7554/eLife.82611>.
- 435 [19] Halloran ME, Longini IM, Struchiner CJ. Design and Analysis of Vaccine Studies. *Statistics for*  
436 *Biology and Health.* Springer New York; 2009. Available from: [https://books.google.nl/books?](https://books.google.nl/books?id=OWFDAAAQBAJ)  
437 [id=OWFDAAAQBAJ](https://books.google.nl/books?id=OWFDAAAQBAJ).
- 438 [20] House T, Riley H, Pellis L, Pouwels KB, Bacon S, Eidukas A, et al. Inferring risks of coronavirus  
439 transmission from community household data. *Stat Methods Med Res.* 2022 Sep;31(9):1738–1756.
- 440 [21] Machin D, Campbell MJ. Surveys, Cohort and Case–Control Studies. In: *Design of Studies for*  
441 *Medical Research.* Wiley Online Books; 2005. p. 109–138. Available from: [https://doi.org/10.](https://doi.org/10.1002/0470012994.ch6)  
442 [1002/0470012994.ch6](https://doi.org/10.1002/0470012994.ch6).

- 443 [22] Goeyvaerts N, Santermans E, Potter G, Torneri A, Van Kerckhove K, Willem L, et al. Household  
444 members do not contact each other at random: implications for infectious disease modelling. *Proc*  
445 *Biol Sci.* 2018 Dec;285(1893):20182201.
- 446 [23] Ball F, O'Neill P. The distribution of general final state random variables for stochastic epidemic  
447 models. *Journal of Applied Probability.* 1999;36(2):473–491.
- 448 [24] Lewis NM, Chu VT, Ye D, Connors EE, Gharpure R, Laws RL, et al. Household Transmission of  
449 Severe Acute Respiratory Syndrome Coronavirus-2 in the United States. *Clinical Infectious Diseases.*  
450 2020 08;73(7):e1805–e1813. Available from: <https://doi.org/10.1093/cid/ciaa1166>.
- 451 [25] DeWolf S, Laracy JC, Perales MA, Kamboj M, van den Brink MRM, Vardhana S. SARS-CoV-  
452 2 in immunocompromised individuals. *Immunity.* 2022;55(10):1779–1798. Available from: <https://www.sciencedirect.com/science/article/pii/S1074761322005003>.
- 453
- 454 [26] Madewell ZJ, Yang Y, Longini IM, Halloran ME, Dean NE. Household Secondary Attack Rates of  
455 SARS-CoV-2 by Variant and Vaccination Status: An Updated Systematic Review and Meta-analysis.  
456 *JAMA Netw Open.* 2022 Apr;5(4):e229317.
- 457 [27] Rozhnova G, van Dorp CH, Bruijning-Verhagen P, Bootsma MCJ, van de Wijgert J, Bonten MJM,  
458 et al. Model-based evaluation of school- and non-school-related measures to control the COVID-19  
459 pandemic [Journal Article]. *Nat Commun.* 2021;12(1):1614. Rozhnova, Ganna van Dorp, Christiaan  
460 H Bruijning-Verhagen, Patricia Bootsma, Martin C J van de Wijgert, Janneke H H M Bonten,  
461 Marc J M Kretzschmar, Mirjam E eng R01 OD011095/OD/NIH HHS/ Evaluation Study Research  
462 Support, N.I.H., Extramural Research Support, Non-U.S. Gov't Research Support, U.S. Gov't, Non-  
463 P.H.S. England 2021/03/14 *Nat Commun.* 2021 Mar 12;12(1):1614. doi: 10.1038/s41467-021-21899-6.  
464 Available from: <https://www.ncbi.nlm.nih.gov/pubmed/33712603>.
- 465 [28] Dekker MM, Coffeng LE, Pijpers FP, Panja D, de Vlas SJ. Reducing societal impacts of SARS-  
466 CoV-2 interventions through subnational implementation. *medRxiv.* 2023; Available from: <https://www.medrxiv.org/content/early/2023/01/02/2022.03.31.22273222>.
- 467
- 468 [29] Otilia O, Alipoor A, Pei S, Shaman J, Rozhnova G. Age-specific transmission dynamics of SARS-  
469 CoV-2 during the first two years of the pandemic. *medRxiv.* 2022;.

- 470 [30] Vos ERA, van Boven M, den Hartog G, Backer JA, Klinkenberg D, van Hagen CCE, et al. Associ-  
471 ations Between Measures of Social Distancing and Severe Acute Respiratory Syndrome Coronavirus  
472 2 Seropositivity: A Nationwide Population-based Study in the Netherlands. *Clin Infect Dis*. 2021  
473 Dec;73(12):2318–2321.
- 474 [31] Lyngse FP, Mølbak K, Denwood M, Christiansen LE, Møller CH, Rasmussen M, et al. Effect  
475 of vaccination on household transmission of SARS-CoV-2 Delta variant of concern [Journal Ar-  
476 ticle]. *Nature Communications*. 2022;13(1):3764. Available from: [https://doi.org/10.1038/  
477 s41467-022-31494-y](https://doi.org/10.1038/s41467-022-31494-y).
- 478 [32] Ball F. A unified approach to the distribution of total size and total area under the trajectory of  
479 infectives in epidemic models. *Advances in Applied Probability*. 1986;18(2):289–310.
- 480 [33] Puhach O, Meyer B, Eckerle I. SARS-CoV-2 viral load and shedding kinetics [Journal Article]. *Nature*  
481 *Reviews Microbiology*. 2022; Available from: <https://doi.org/10.1038/s41579-022-00822-w>.
- 482 [34] de Greeff SC, de Melker HE, Westerhof A, Schellekens JF, Mooi FR, van Boven M. Estimation of  
483 household transmission rates of pertussis and the effect of cocooning vaccination strategies on infant  
484 pertussis. *Epidemiology*. 2012 Nov;23(6):852–860.
- 485 [35] Lang S, Brezger A. Bayesian P-Splines. *Journal of Computational and Graphical Statistics*.  
486 2004;13(1):183–212. Available from: <http://www.jstor.org/stable/1391151>.
- 487 [36] Carpenter B, Gelman A, Hoffman MD, Lee D, Goodrich B, Betancourt M, et al. Stan: A Probabilistic  
488 Programming Language. *Journal of Statistical Software*. 2017;76(1):1–32. Available from: [https:  
489 //www.jstatsoft.org/index.php/jss/article/view/v076i01](https://www.jstatsoft.org/index.php/jss/article/view/v076i01).
- 490 [37] Watanabe S. A Widely Applicable Bayesian Information Criterion. *J Mach Learn Res*. 2013  
491 Mar;14(1):867–897. Available from: <http://dl.acm.org/citation.cfm?id=2502581.2502609>.
- 492 [38] Vehtari A, Gelman A, Gabry J. Practical Bayesian model evaluation using leave-one-out cross-  
493 validation and WAIC [Journal Article]. *Statistics and Computing*. 2017;27(5):1413–1432. Available  
494 from: <https://doi.org/10.1007/s11222-016-9696-4>.
